# Supplementary material for: Exploring the targeting spectrum of rocaglates among eIF4A homologs
Source: PubMed Central journal article supplement — RNA. 2023 Jun;29(6):826–35. doi: 10.1261/rna.079318.122 (PMC10187672; doi:10.1261/rna.079318.122), 2023-06
Supplement: supp_079318.122_Supplemental_Figures.pdf [file supp_079318.122_Supplemental_Figures.pdf]

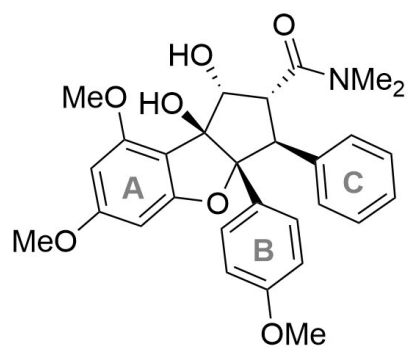

**RocA**

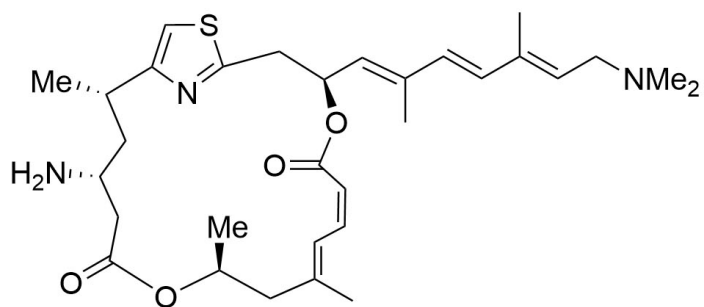

**PatA**

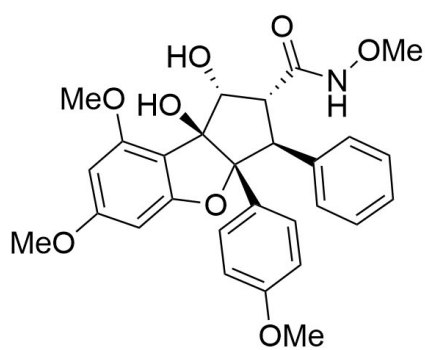

**CR-1-31B**

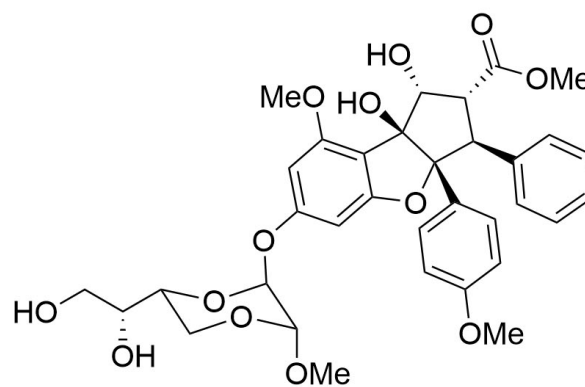

**silvestrol**

**Figure S1.** Chemical structure of rocaglates (RocA, CR-1-31B, and silvestrol) and pateamine A used in this study.

## Cyclopenta[*b*]benzofurans

Standard rocaglate

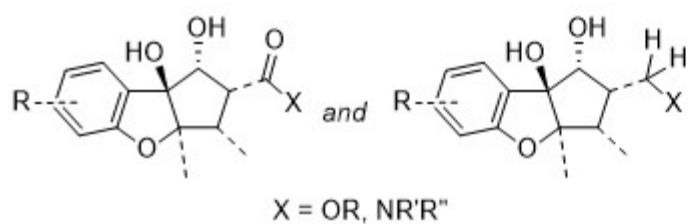

Rocaglaol

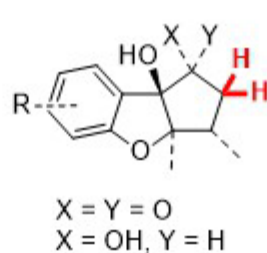

Rocaglate ketone

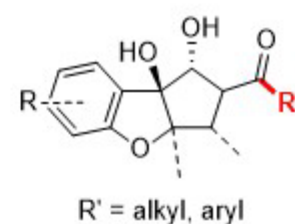

Amidino rocaglate (ADR)

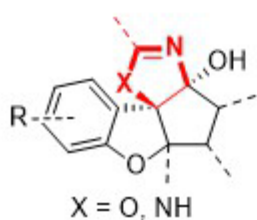

C8b amino rocaglate

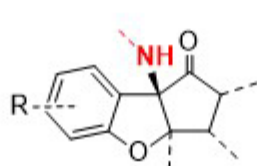

Rocaglate pyrimidinone (RP)

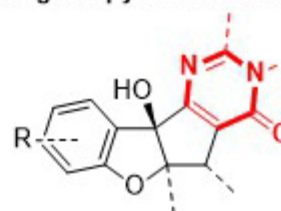

## Cyclopenta[*b,c*]benzopyrans

Aglain

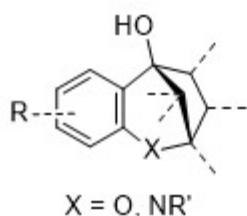

Nonstandard rocaglate

(one example)

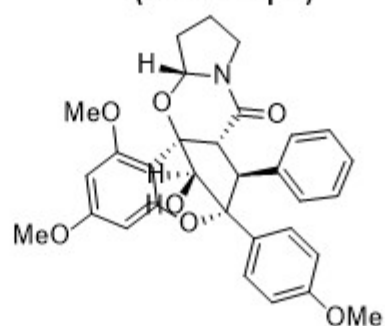

## Cyclopenta[*b*]indoles

Aza-rocaglate

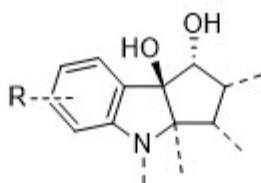

Figure S2. Summary of rocaglate scaffolds and subclasses used in Fig. 2.

**a**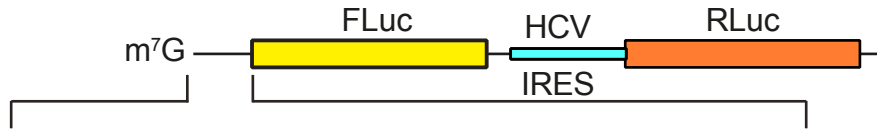

$m^7Gppp$ GUCAGAAUUAACCGUGUGUUCACUAGCAACCUCAU**AUG**

(NMD)FF/HCV-IRES/Ren

4.04/4.06 5' Leader  
Region

$m^7Gppp$ GAGAGAGAGAGAGAGAGAGUGUGUUCACUAGCAACCUCAU**AUG**

(AG)FF/HCV-IRES/Ren

$m^7Gppp$ UCUCUCUCUCUCUCUCUCUCUCUCGUGUGUUCACUAGCAACCUCAU**AUG**

(UC)FF/HCV-IRES/Ren

**b**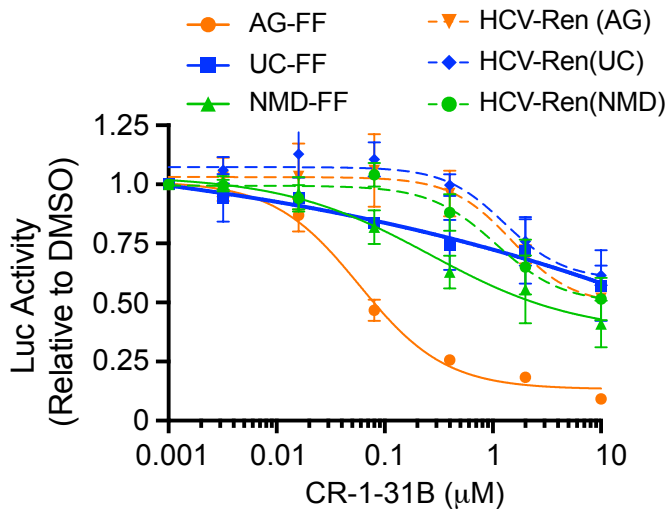**c**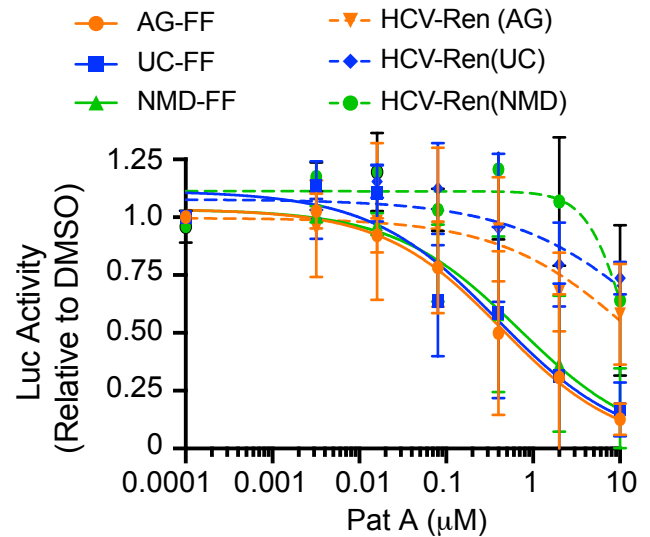**d**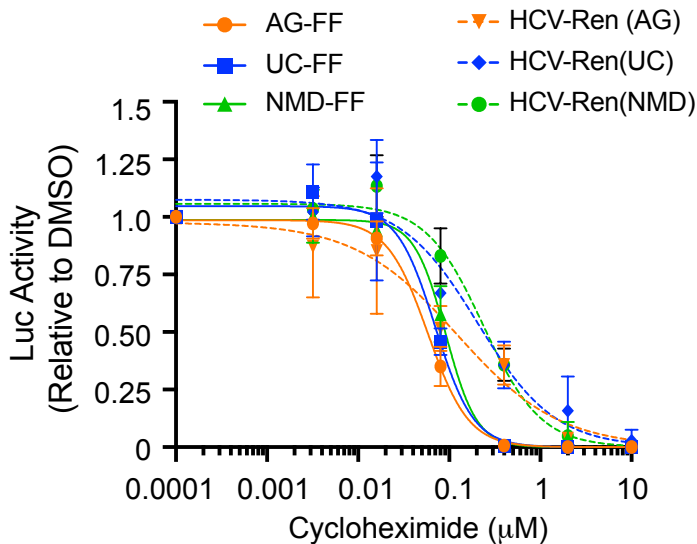

**Figure S3.** Assessing mRNA sensitivity towards CR-1-31B, PatA, or cycloheximide. **a.** Reporter constructs used to assess rocaglate-responsiveness of the indicated 5' leader regions. The nucleotides underlined in (NMD)FF/HCV-IRES/Ren and labelled "4.04/4.06 5' Leader Region" are the nucleotides comprising the 5' leader region of FF-4.04 and FF-4.06 reporters in Fig. 4. **b-d.** Messenger RNA translational response obtained in Krebs-2 extracts towards CR-1-31B (**b**), PatA (**c**), or cycloheximide (**d**).  $n = 3 \pm SD$ .
